# Supplementary material
Source: PubMed Central journal article supplement (PMC10687351)
Supplement: erad155_suppl_supplementary_figures_s1-s4.pdf [file erad155_suppl_supplementary_figures_s1-s4.pdf]

## SUPPLEMENTAL FIGURES

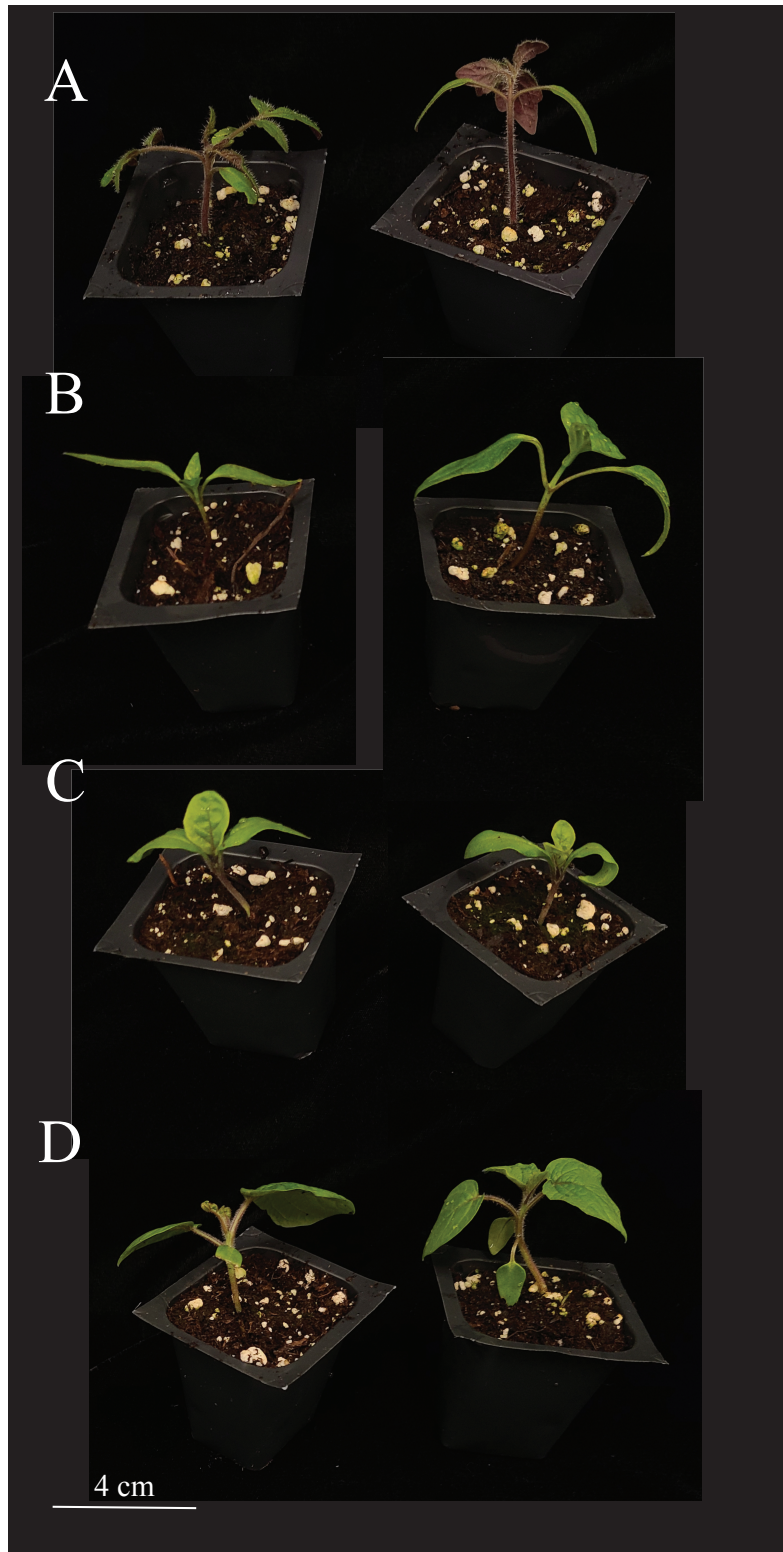

**Fig. S1: Solanoideae species utilized in graft trial.** Duplication of tomato (A), pepper (B), eggplant (C), and groundcherry (D) seedlings used in the graft trial (Fig.s 2). All images set to equal, scale bar = 4 cm.

A

Tomato:  
Pepper

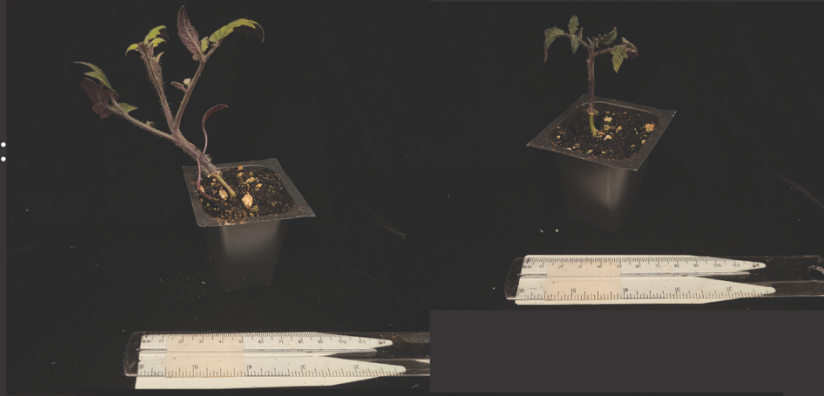

B

Tomato:  
Eggplant

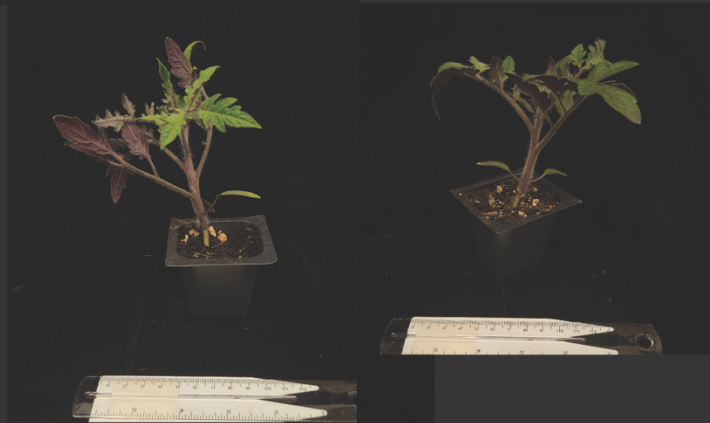

C

Tomato:  
Groundcherry

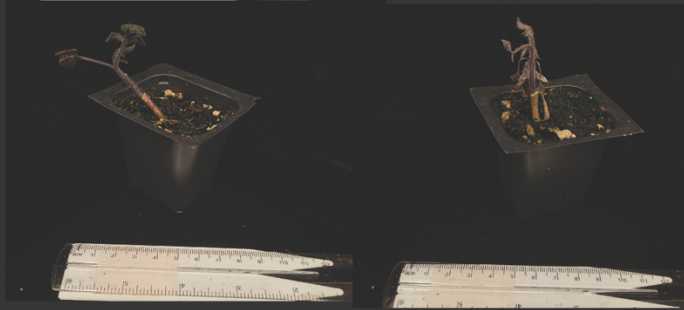

D

Tomato:  
Tomato

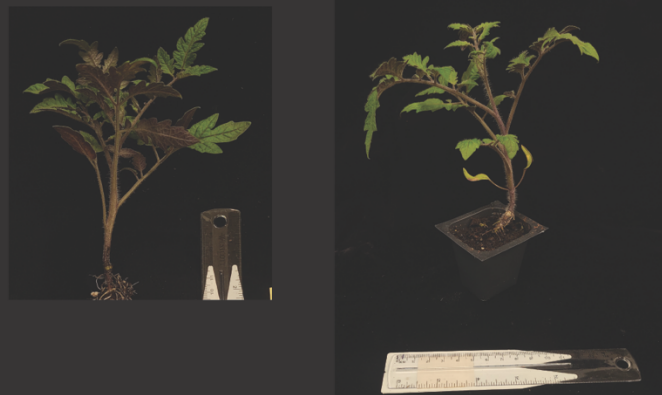

E

Eggplant:  
Tomato

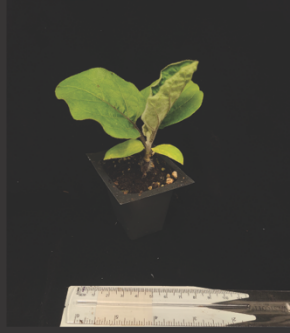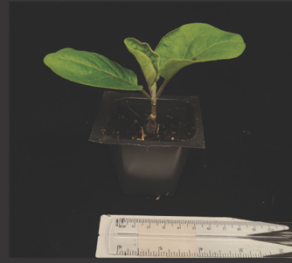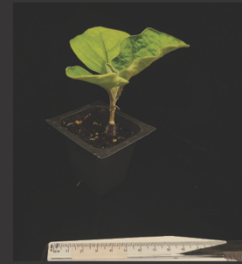

F

Eggplant:  
Eggplant

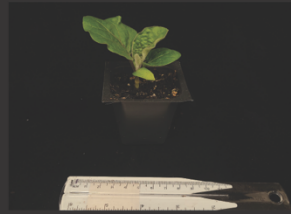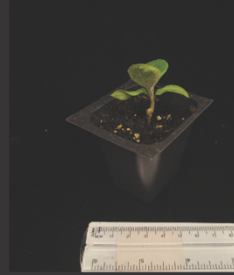

G

Eggplant:  
Pepper

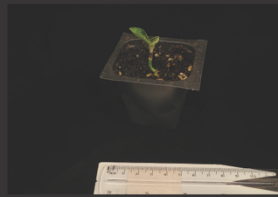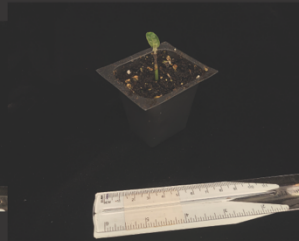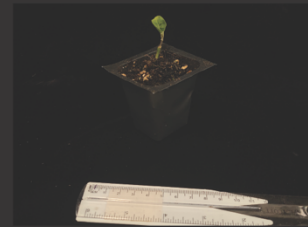

H

Eggplant:  
Groundcherry

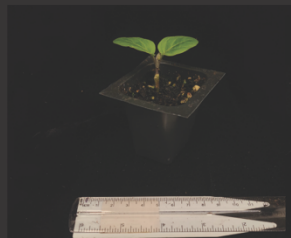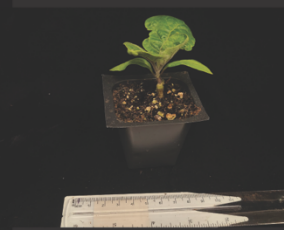

I

Pepper:  
Tomato

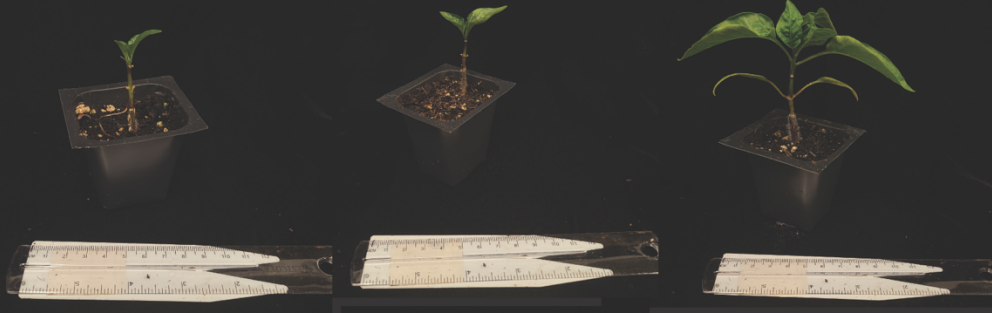

J

Pepper:  
Eggplant

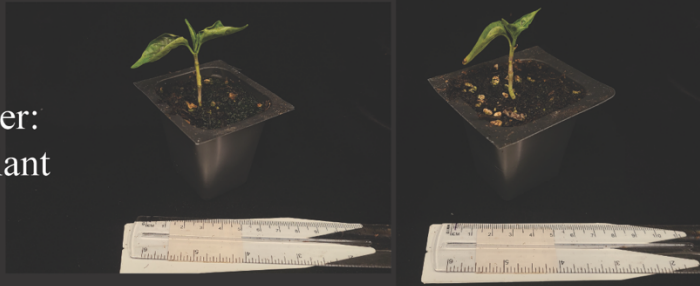

K

Pepper:  
Pepper

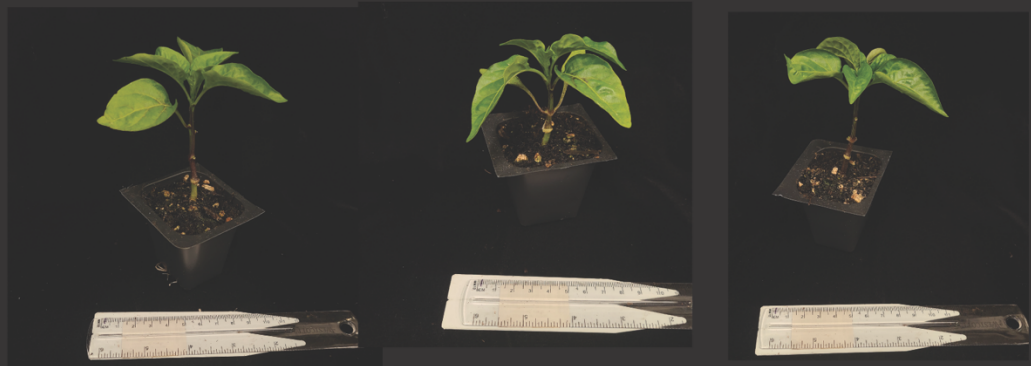

L

Pepper:  
Groundcherry

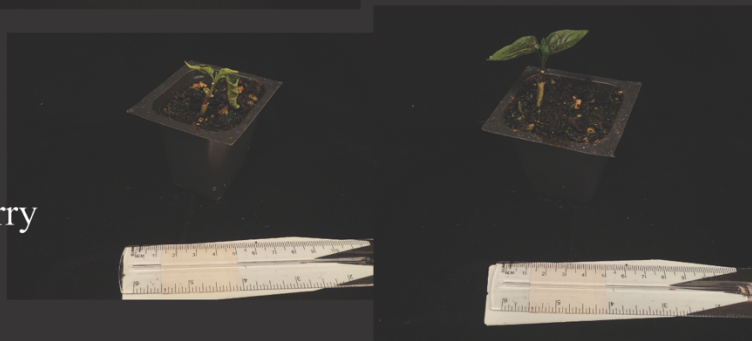



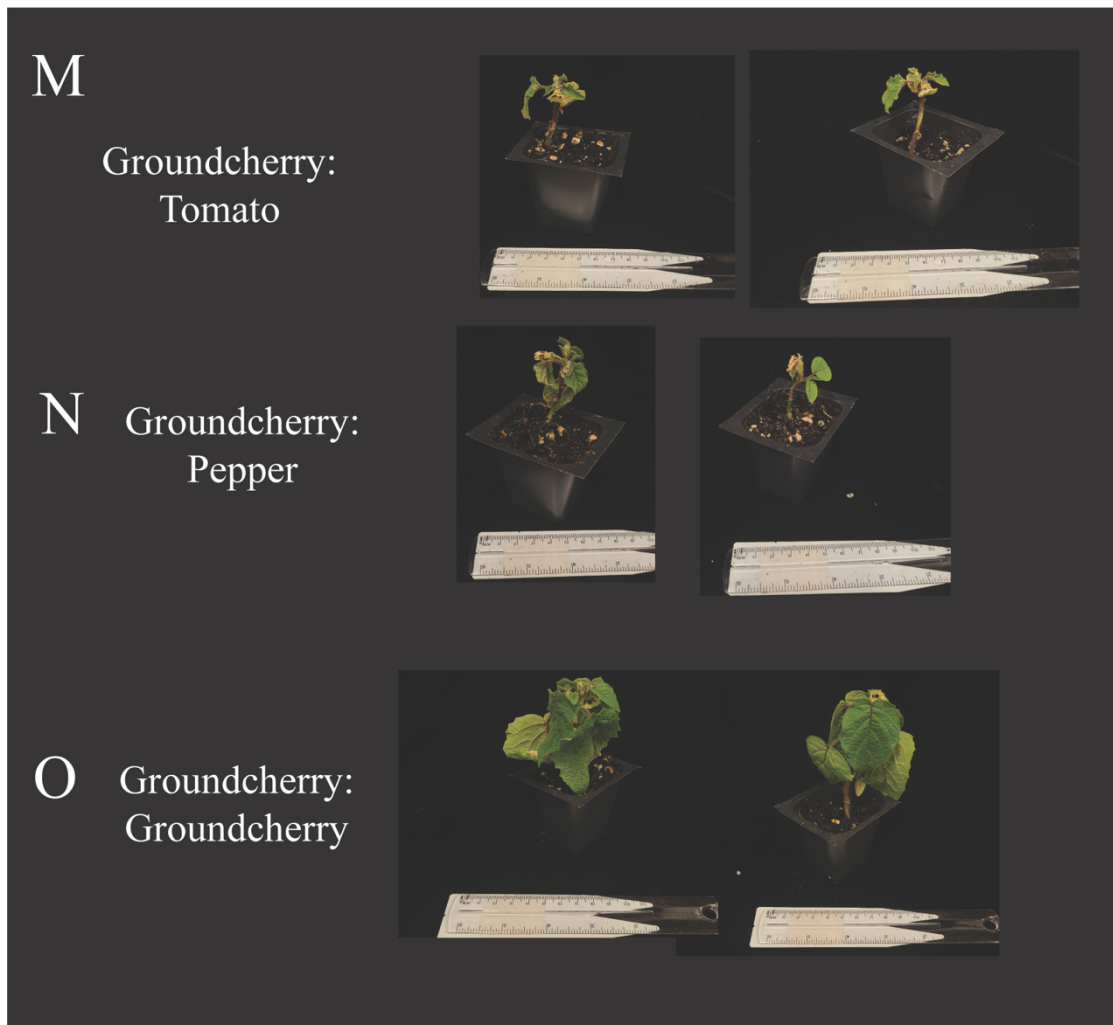

**Fig. S2: Solanoideae graft combinations 30 DAG.** Additional images of tomato:tomato (A), tomato:eggplant (B), tomato:pepper (C), tomato:groundcherry (D), eggplant:tomato (E), eggplant:eggplant (F), eggplant:pepper (G), eggplant:groundcherry (H), pepper:tomato (I), pepper:eggplant (J), pepper:pepper (K), pepper:groundcherry (L), groundcherry:tomato (M), groundcherry:pepper (N), groundcherry:groundcherry (O) grafts shown in Fig. 3. Ruler shown below each plant.

A

Tomato:  
Tomato

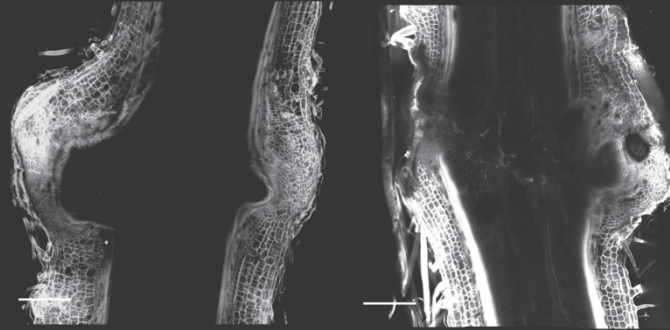

B

Tomato:  
Eggplant

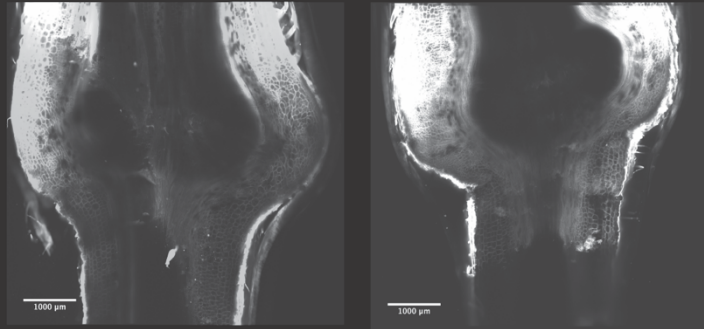

C

Tomato:  
Pepper

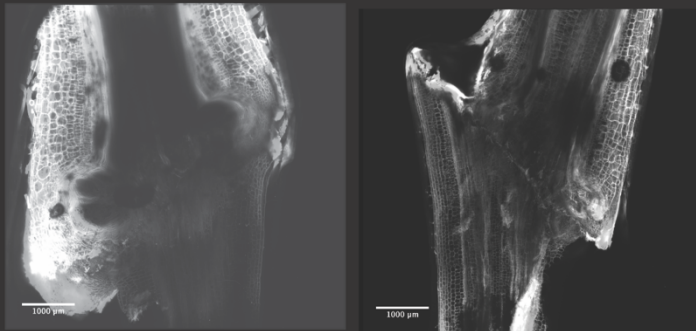

D

Tomato:  
Groundcherry

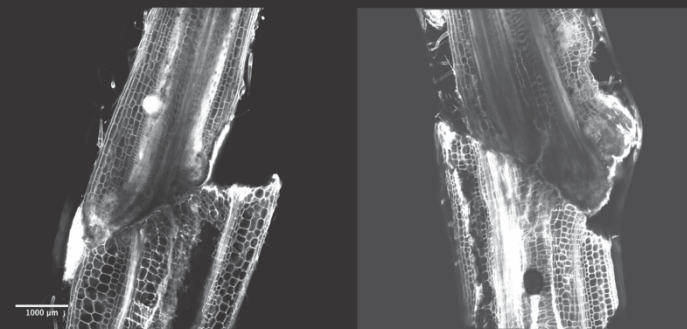

E

Eggplant:  
Tomato

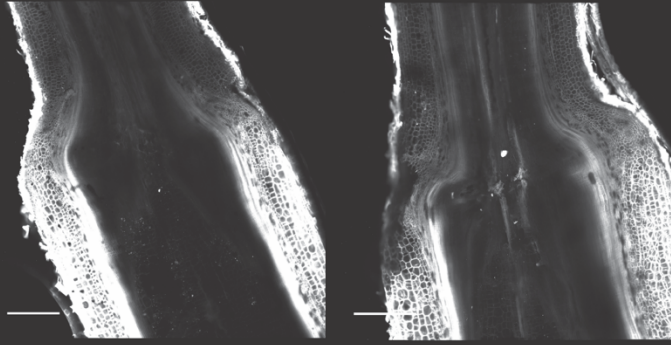

F

Eggplant:  
Eggplant

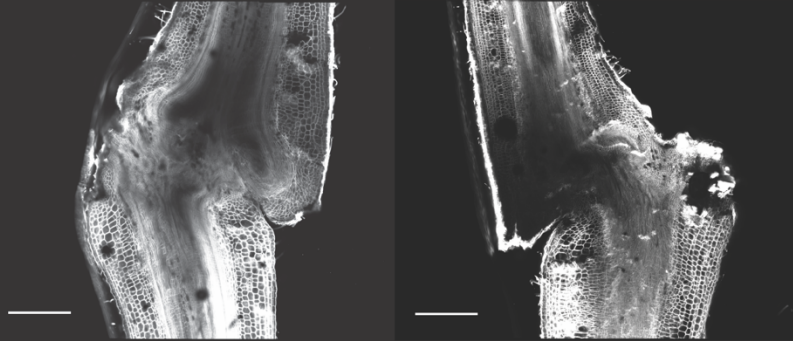

G

Eggplant:  
Pepper

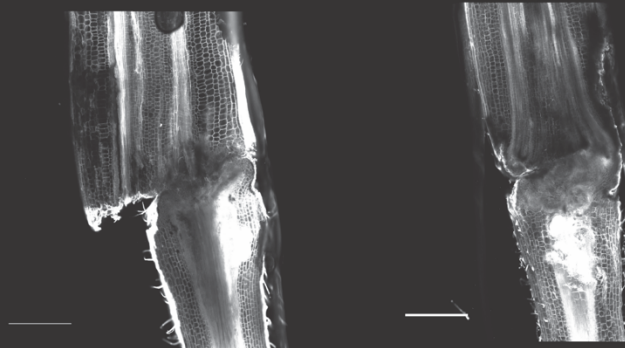

H

Eggplant:  
Groundcherry

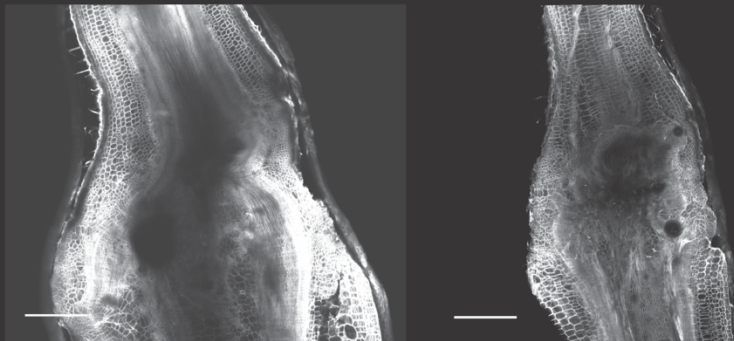

I

Pepper:  
Tomato

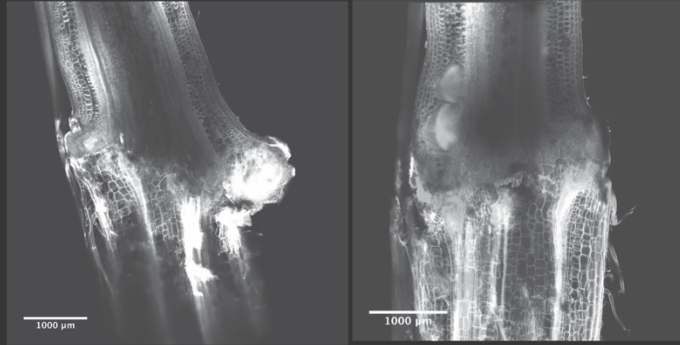

J

Pepper:  
Eggplant

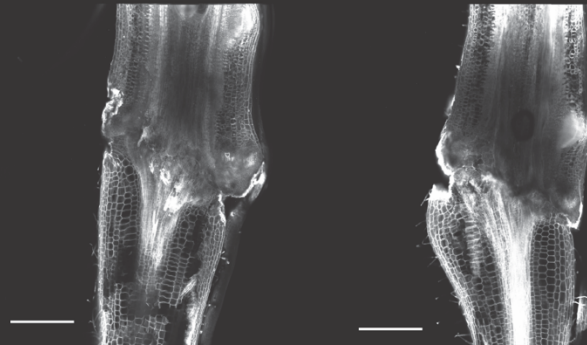

K

Pepper:  
Pepper

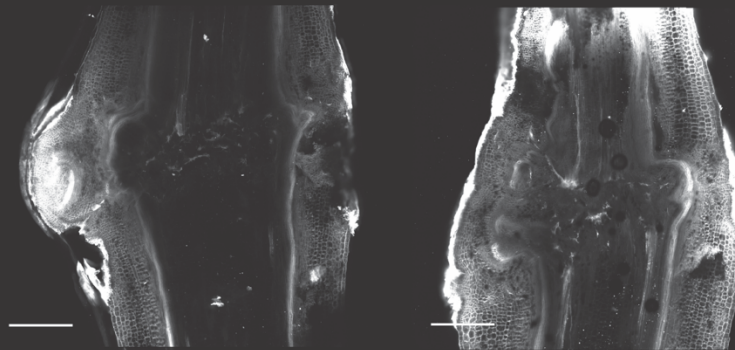

L

Pepper:  
Groundcherry

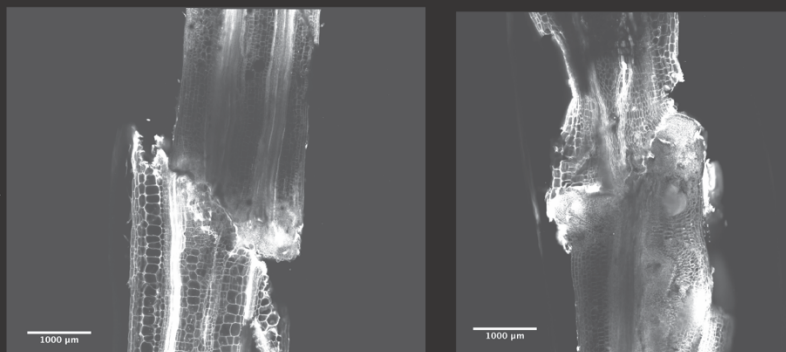



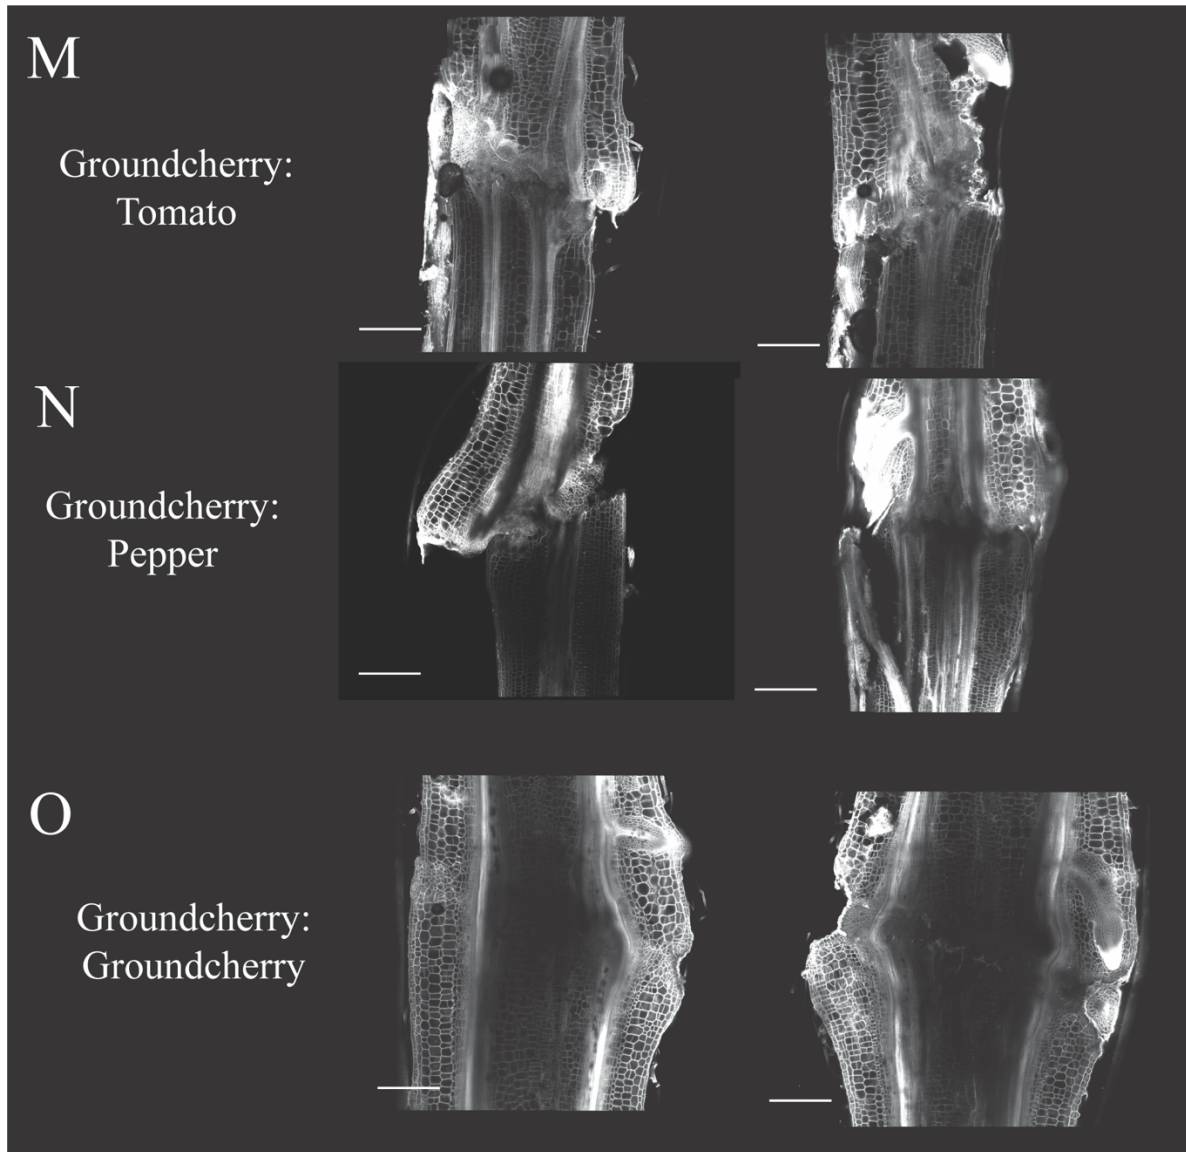

**Fig. S3: Propidium iodide stained solanoideae graft junctions 30 DAG.** Duplication of tomato:tomato (A), tomato:eggplant (B), tomato:pepper (C), tomato:groundcherry (D), eggplant:tomato (E), eggplant:eggplant (F), eggplant:pepper (G), eggplant:groundcherry (H), pepper:tomato (I), pepper:eggplant (J), pepper:pepper (K), pepper:groundcherry (L), groundcherry:tomato (M), groundcherry:eggplant (N), groundcherry:pepper (O), groundcherry:groundcherry (P) grafts shown in Fig. 6. Scale bars are equal to 1 mm.

Tukeys Multiple Comparison of Means

Scion diameter 30 DAG

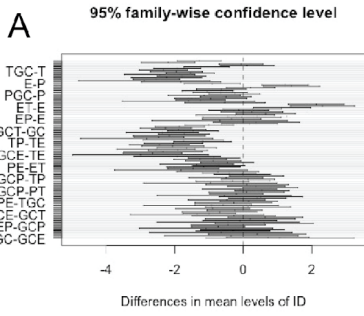

Levene Test of Homogeneity

**B**

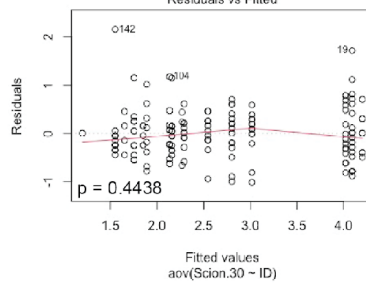

Wilks-Shapiro Test for Parametric Analysis

**C**

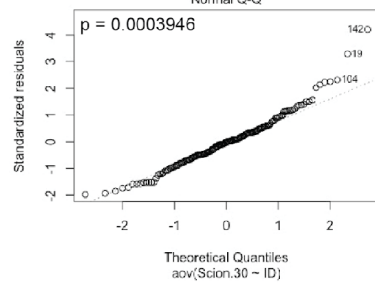

Stock diameter 30 DAG

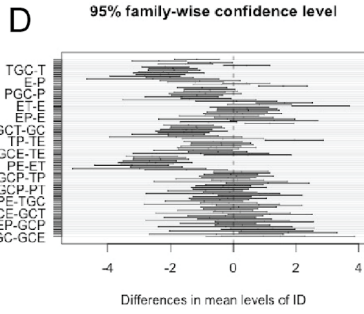

**E**

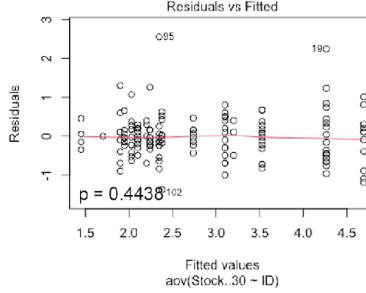

**F**

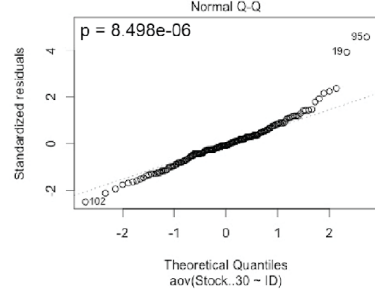

Change in scion diameter 30 DAG

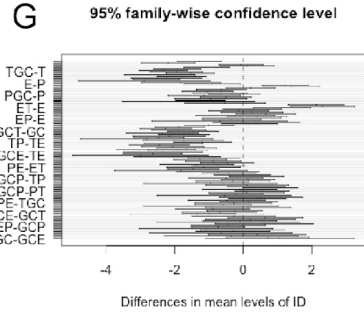

**H**

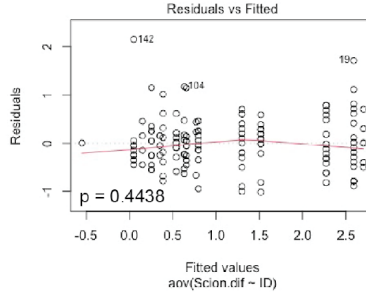

**I**

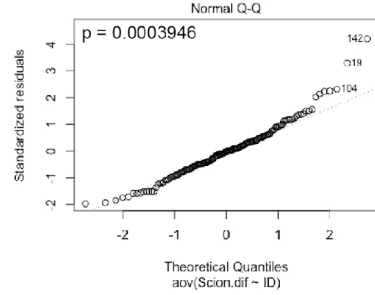

Change in stock diameter 30 DAG

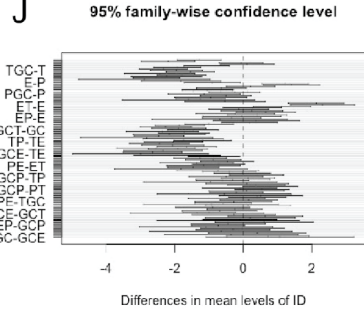

**K**

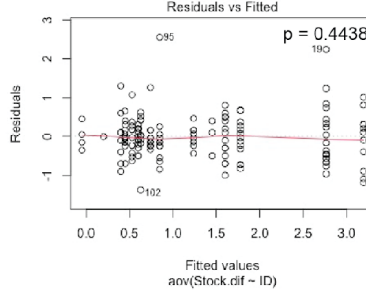

**L**

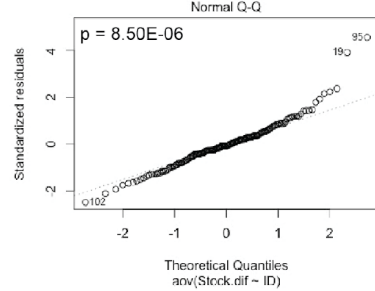

Difference between stock and scion 30 DAG

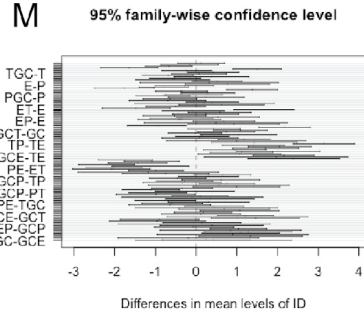

**Fig. S4: Tukey's Multiple Comparison of Means, Levene's Test and Wilks-Shapiro Tests.** Tukey's Multiple Comparison of Means Test was used to perform pairwise comparisons (A, D, G, J, M). Levene's Test of Homogeneity was used to determine if the data was homogenous (B, E, H, K). A p-value above 0.05 means the data is homogeneous. Wilks-Shapiro test was used to determine the parametric nature of the data (C, F, I, L). A p-value above 0.05 means the data is normal.
